# Supplementary material
Source: publisher figshare collection journal article supplement (https://acs.figshare.com/ndownloader/files/3742441)
Supplement: Supplementary file 1 [file 3742441]

Compound	SMILES
1f	OCC1=C(C2=CC=CN2)SC(NC(NCC)=O)=N1
4	O/C(C(OC)=O)=C\C1=CC=CN1S(C2=CC=C(C)C=C2)(=O)=O
5	NC1=NC(C(OC)=O)=C(C2=CC=CN2S(C3=CC=C(C)C=C3)(=O)=O)S1
6	O=C(OC)C1=C(C2=CC=CN2S(C3=CC=C(C)C=C3)(=O)=O)SC(NC(NCC)=O)=N1
7	CCNC(NC1=NC(/C=C/C2=CN=CC=C2)=C(C3=CC=CN3)S1)=O
8	BrC1=CC2=C(C([N+]([O-])=O)=CN2)N=C1
9	NC1=CNC2=C1N=CC(Br)=C2
10	O=C(NCC)NC1=CNC2=C1N=CC(Br)=C2
11	O=C(NCC)NC1=CNC2=C1N=CC(C3=CC=CN=C3)=C2
12	O=C(NCC)NC1=CN(C2=NC=CC=C2)C3=C1N=CC(C4=CC=CN=C4)=C3
13	O=C(NCC)NC1=CN(C2=NC=CC=N2)C3=C1N=CC(C4=CC=CN=C4)=C3
14	O=C(NCC)NC1=CN(C2=C(C)C=CC=N2)C3=C1N=CC(C4=CC=CN=C4)=C3
15	O=C(NCC)NC1=CN(C2=NC(C)=CC=N2)C3=C1N=CC(C4=CC=CN=C4)=C3
16	O=C(NCC)NC1=CN(C2=NC(CCO)=CC=N2)C3=C1N=CC(C4=CC=CN=C4)=C3
17	O=C(NCC)NC1=CN(C2=NC(CCCO)=CC=N2)C3=C1N=CC(C4=CC=CN=C4)=C3
18	O=C(NCC)NC1=CN(C2=NC(CCC(O)=O)=C(C)C=N2)C3=C1N=CC(C4=CC=CN=C4)=C3
19	O=C(NCC)NC1=CN(C2=NC(CCCC(O)=O)=C(C)C=N2)C3=C1N=CC(C4=CC=CN=C4)=C3
20	O=C(NCC)NC1=CN(C2=NC=C(C)C=N2)C3=C1N=CC(C4=CC=CN=C4)=C3
21	O=C(NCC)NC1=CN(C2=NC=C(CC)C=N2)C3=C1N=CC(C4=CC=CN=C4)=C3
22	O=C(NCC)NC1=CN(C2=NC=C(OC)C=N2)C3=C1N=CC(C4=CC=CN=C4)=C3
23	O=C(NCC)NC1=CN(C2=NC=C(F)C=N2)C3=C1N=CC(C4=CC=CN=C4)=C3
24	O=C(NCC)NC1=CN(C2=NC=C(Cl)C=N2)C3=C1N=CC(C4=CC=CN=C4)=C3
25	O=C(NCC)NC1=CN(C2=NC=C(Br)C=N2)C3=C1N=CC(C4=CC=CN=C4)=C3
26	O=C(NCC)NC1=CN(C2=NC=C(C#N)C=N2)C3=C1N=CC(C4=CC=CN=C4)=C3
27	O=C(NCC)NC1=CN(C2=NC=C(C(F)(F)F)C=N2)C3=C1N=CC(C4=CC=CN=C4)=C3
28	O=C(NCC)NC1=CN(C)C2=C1N=CC(C3=CC=CN=C3)=C2
29	O=C(NCC)NC1=CN(CC2=CC=CC=C2)C3=C1N=CC(C4=CC=CN=C4)=C3
30	O=C(NCC)NC1=CN(CCOC)C2=C1N=CC(C3=CC=CN=C3)=C2
31	O=C(NCC)NC1=CN(CC=C)C2=C1N=CC(C3=CC=CN=C3)=C2
32	O=C(NCC)NC1=CN(CC(O)CO)C2=C1N=CC(C3=CC=CN=C3)=C2
33	O=C(NCC)NC1=CN(C2C=CCCC2)C3=C1N=CC(C4=CC=CN=C4)=C3
34	O=C(NCC)NC1=CN(C2CCCCC2)C3=C1N=CC(C4=CC=CN=C4)=C3
35	O=C(NCC)NC1=CN(C2CCN(C)CC2)C3=C1N=CC(C4=CC=CN=C4)=C3
36	O=C(NCC)NC1=CN(C2C(N(C)CC2)=O)C3=C1N=CC(C4=CC=CN=C4)=C3
37	O=C(NCC)NC1=CN(C(C2=NC=CC=C2)=O)C3=C1N=CC(C4=CC=CN=C4)=C3
38	O=C(NCC)NC1=CN(C(C=C)=O)C2=C1N=CC(C3=CC=CN=C3)=C2
39	O=C(NCC)NC1=CN(C2=NC=C(Cl)C=N2)C3=C1N=CC(C4=CN=C(C#N)N=C4)=C3
40	O=C(NCC)NC1=CN(C2=NC=C(Cl)C=N2)C3=C1N=CC(C4=CC=CN=C4F)=C3
41	O=C(NCC)NC1=CN(C2=NC=CC=N2)C3=C1N=CC(N4C=C(C(NC5CC5)=O)N=C4)=C3
42	O=C(NCC)NC1=CN(C2=NC=CC=N2)C3=C1N=CC(C4=CC(N(C)C=C4)=O)=C3
43	O=C(NCC)NC1=CN(C2=NC=C(C)C=N2)C3=C1N=CC(C4=CC(N(C)C=C4)=O)=C3
44	O=C(NCC)NC1=CN(C2=NC=C(Cl)C=N2)C3=C1N=CC(C4=CC(N(C)C=C4)=O)=C3
45	O=C(NCC)NC1=CN(C2=NC=C(CC)C=N2)C3=C1N=CC(C4=CC(N(C)C=C4)=O)=C3
46	O=C(NCC)NC1=CN(C2=NC=C(Br)C=N2)C3=C1N=CC(C4=CC(N(C)C=C4)=O)=C3
47	O=C(NCC)NC1=CN(C2=NC=C(Br)C=N2)C3=C1N=CC(C4=CC(N(CCO)C=C4)=O)=C3
